# Supplementary material for: Immersion Vaccination by a Biomimetic-Mucoadhesive Nanovaccine Induces Humoral Immune Response of Red Tilapia (Oreochromis sp.) against Flavobacterium columnare Challenge
Source: MDPI journal article supplement (doi:10.3390/vaccines9111253), 2021-10-29
Supplement: s1 [file s1]

**Supplementary Table S1:** Standardization data of the indirect ELISA

| Antigen 2 fold dilution (ug/ml) | 20     | 10     | 5      | 2.5**  | 1.25   | PBS    | 20             | 10     | 5      | 2.5**  | 1.25   | PBS    |        |
|---------------------------------|--------|--------|--------|--------|--------|--------|----------------|--------|--------|--------|--------|--------|--------|
| Serum 2 fold dilution           | 1:20   | 0.8642 | 0.4235 | 0.4103 | 0.4012 | 0.3897 | 0.2344         | 2.3793 | 2.3421 | 2.1095 | 1.9867 | 1.6782 | 0.6811 |
|                                 | 1:40   | 0.7314 | 0.3541 | 0.3243 | 0.3045 | 0.2314 | 0.2152         | 2.2134 | 2.1038 | 1.9873 | 1.8643 | 1.4978 | 0.5371 |
|                                 | 1:80   | 0.4712 | 0.3157 | 0.2376 | 0.2287 | 0.2134 | 0.2008         | 2.1342 | 1.8723 | 1.5972 | 1.6722 | 1.3421 | 0.2972 |
| **                              | 1:160  | 0.2971 | 0.1987 | 0.1863 | 0.1673 | 0.1583 | 0.1132         | 1.9782 | 1.5347 | 1.4222 | 1.3147 | 1.2457 | 0.1253 |
|                                 | 1:320  | 0.1978 | 0.1871 | 0.1781 | 0.1559 | 0.1357 | 0.1103         | 1.8631 | 1.2473 | 1.1243 | 0.8972 | 0.5782 | 0.1324 |
|                                 | 1:640  | 0.1876 | 0.1688 | 0.1534 | 0.1422 | 0.1401 | 0.1211         | 1.3425 | 0.6978 | 0.9718 | 0.6472 | 0.3223 | 0.1291 |
|                                 | 1:1280 | 0.1301 | 0.1253 | 0.1182 | 0.1073 | 0.1033 | 0.1019         | 0.7984 | 0.6472 | 0.6312 | 0.5124 | 0.2147 | 0.1732 |
|                                 | PBS    | 0.1075 | 0.1102 | 0.1031 | 0.0981 | 0.1092 | 0.0987         | 0.3241 | 0.2479 | 0.1247 | 0.1282 | 0.1103 | 0.1007 |
| negative serum                  |        |        |        |        |        |        | positive serum |        |        |        |        |        |        |

| Antigen 2 fold dilution (ug/ml) | 20     | 10     | 5      | 2.5**  | 1.25   | PBS    | 20             | 10     | 5      | 2.5**  | 1.25   | PBS    |        |
|---------------------------------|--------|--------|--------|--------|--------|--------|----------------|--------|--------|--------|--------|--------|--------|
| Serum 2 fold dilution           | 1:20   | 0.9123 | 0.4813 | 0.4031 | 0.3972 | 0.3811 | 0.2293         | 2.3793 | 2.3421 | 2.1095 | 1.9867 | 1.6782 | 0.6811 |
|                                 | 1:40   | 0.8212 | 0.3782 | 0.3456 | 0.2789 | 0.2245 | 0.2271         | 2.2134 | 2.1038 | 1.9873 | 1.8643 | 1.4978 | 0.5371 |
|                                 | 1:80   | 0.5213 | 0.2913 | 0.2731 | 0.2109 | 0.1973 | 0.2017         | 2.1342 | 1.8723 | 1.5972 | 1.6722 | 1.3421 | 0.2972 |
| **                              | 1:160  | 0.311  | 0.2013 | 0.1934 | 0.1732 | 0.1583 | 0.1132         | 1.9782 | 1.5347 | 1.4222 | 1.3147 | 1.2457 | 0.1253 |
|                                 | 1:320  | 0.2013 | 0.1834 | 0.1697 | 0.1521 | 0.1322 | 0.1239         | 1.8631 | 1.2473 | 1.1243 | 0.8972 | 0.5782 | 0.1324 |
|                                 | 1:640  | 0.1791 | 0.1639 | 0.1522 | 0.1397 | 0.1287 | 0.1173         | 1.3425 | 0.6978 | 0.9718 | 0.6472 | 0.3223 | 0.1291 |
|                                 | 1:1280 | 0.1301 | 0.1253 | 0.1182 | 0.1073 | 0.1033 | 0.9917         | 0.7984 | 0.6472 | 0.6312 | 0.5124 | 0.2147 | 0.1732 |
|                                 | PBS    | 0.0978 | 0.1017 | 0.0983 | 0.1005 | 0.1038 | 0.092          | 0.3241 | 0.2479 | 0.1247 | 0.1782 | 0.1678 | 0.1572 |
| negative serum                  |        |        |        |        |        |        | positive serum |        |        |        |        |        |        |

**Supplementary Table S2:** Data of the indirect ELISA-OD value at 450 nm of *F. columnare*-seronegative and -seropositive tilapia sera.

| Serum           | Replicate 1 |        |        |        |        | Replicate 2 |        |        |        |        |
|-----------------|-------------|--------|--------|--------|--------|-------------|--------|--------|--------|--------|
|                 | 1:40        | 1:80   | 1:160  | 1:320  | 1:640  | 1:40        | 1:80   | 1:160  | 1:320  | 1:640  |
| Seronegative 1  | 0.2209      | 0.193  | 0.1694 | 0.0799 | 0.0648 | 0.2236      | 0.1931 | 0.1511 | 0.0813 | 0.0671 |
| Seronegative 2  | 0.2788      | 0.2432 | 0.2333 | 0.0712 | 0.0614 | 0.2904      | 0.2371 | 0.2065 | 0.077  | 0.0671 |
| Seronegative 3  | 0.1857      | 0.1685 | 0.1365 | 0.0747 | 0.0606 | 0.2059      | 0.1642 | 0.1266 | 0.0765 | 0.0738 |
| Seronegative 4  | 0.2676      | 0.2163 | 0.1721 | 0.0818 | 0.0564 | 0.2649      | 0.2194 | 0.1847 | 0.0944 | 0.0707 |
| Seronegative 5  | 0.2669      | 0.2197 | 0.1709 | 0.0695 | 0.0613 | 0.2556      | 0.2112 | 0.1717 | 0.0812 | 0.063  |
| Seronegative 6  | 0.2662      | 0.2362 | 0.1762 | 0.0677 | 0.0532 | 0.282       | 0.2489 | 0.2082 | 0.0795 | 0.0675 |
| Seronegative 7  | 0.2113      | 0.1991 | 0.1772 | 0.0817 | 0.0707 | 0.1941      | 0.1888 | 0.1609 | 0.0723 | 0.0633 |
| Seronegative 8  | 0.2267      | 0.1864 | 0.1508 | 0.1141 | 0.0964 | 0.2317      | 0.1966 | 0.1336 | 0.0963 | 0.0892 |
| Seronegative 9  | 0.2632      | 0.2127 | 0.1777 | 0.0785 | 0.0565 | 0.2884      | 0.2024 | 0.1730 | 0.091  | 0.0741 |
| Seronegative 10 | 0.2549      | 0.2127 | 0.1795 | 0.083  | 0.0755 | 0.2469      | 0.1819 | 0.1491 | 0.0857 | 0.0795 |
| Seronegative 11 | 0.2158      | 0.1873 | 0.1524 | 0.0885 | 0.0776 | 0.2027      | 0.1697 | 0.1244 | 0.0792 | 0.0688 |
| Seronegative 12 | 0.2242      | 0.1708 | 0.1437 | 0.0807 | 0.0651 | 0.2155      | 0.1915 | 0.1659 | 0.091  | 0.0801 |
| Seronegative 13 | 0.2292      | 0.1827 | 0.1621 | 0.0892 | 0.078  | 0.2323      | 0.195  | 0.1530 | 0.0878 | 0.0623 |
| Seronegative 14 | 0.2186      | 0.1802 | 0.1598 | 0.0899 | 0.0745 | 0.2026      | 0.1526 | 0.1241 | 0.0756 | 0.0616 |
| Seronegative 15 | 0.274       | 0.2486 | 0.2131 | 0.11   | 0.0732 | 0.2606      | 0.2305 | 0.2025 | 0.1034 | 0.0725 |
| Seropositive 1  | 1.9873      | 1.5972 | 1.4222 | 1.1243 | 0.9718 | 1.9612      | 1.678  | 1.397  | 1.1378 | 0.924  |

  

|                     |        |        |
|---------------------|--------|--------|
| Mean (Seronegative) | SD     | 3SD    |
| 0.1670              | 0.0270 | 0.0810 |

**Supplementary Table S3:** Data of the number of viable bacteria (CFU/mL) and bactericidal rate. Bactericidal rate was calculated as follows:  $(1 - \frac{\text{the number of viable bacteria after serum treatment}}{\text{the number of viable bacteria after PBS treatment}}) \times 100\%$  [16].

| Day |                   | PBS control |           | Group    |          |          |          |          |          |          |          |
|-----|-------------------|-------------|-----------|----------|----------|----------|----------|----------|----------|----------|----------|
|     |                   | PBS         |           | control  |          | polymer  |          | WC       |          | CS-NE    |          |
| 1   | CFU/mL            | 9.8x10*7    | 1.03x10*8 | 9.0x10*7 | 9.3x10*7 | 8.6x10*7 | 9.4x10*7 | 8.4x10*7 | 9.3x10*7 | 8.9x10*7 | 9.2x10*7 |
|     | Bactericidal rate | -           | -         | 8        | 10       | 12       | 9        | 14       | 10       | 9        | 11       |
| 3   | CFU/mL            | 1.05x10*8   | 9.3x10*7  | 8.9x10*7 | 9.1x10*7 | 8.7x10*7 | 7.3x10*7 | 7.6x10*7 | 7.7x10*7 | 7.4x10*7 | 7.0x10*7 |
|     | Bactericidal rate | -           | -         | 15       | 2        | 17       | 22       | 28       | 17       | 30       | 25       |
| 14  | CFU/mL            | 1.13x10*8   | 1.02x10*8 | 9.7x10*7 | 9.3x10*7 | 9.8x10*7 | 8.4x10*7 | 6.5x10*7 | 6.6x10*7 | 5.9x10*7 | 5.6x10*7 |
|     | Bactericidal rate | -           | -         | 14       | 9        | 13       | 18       | 42       | 35       | 48       | 45       |
| 21  | CFU/mL            | 9.7x10*8    | 1.12x10*7 | 8.7x10*7 | 9.9x10*7 | 8.1x10*7 | 9.7x10*7 | 6.4x10*7 | 5.8x10*7 | 2.8x10*7 | 2.6x10*7 |
|     | Bactericidal rate | -           | -         | 10       | 12       | 16       | 13       | 34       | 48       | 71       | 77       |

**Supplement Table S4:** Data of serum OD value (450 nm) from tilapias in each group at different time points after vaccination.

| Day 1  | Control | WC     | CS-NE  | Polymer |
|--------|---------|--------|--------|---------|
|        | 0.1549  | 0.1820 | 0.1990 | 0.1870  |
|        | 0.1699  | 0.1706 | 0.2439 | 0.1434  |
|        | 0.1743  | 0.1893 | 0.1654 | 0.1927  |
|        | 0.1387  | 0.1882 | 0.1943 | 0.1779  |
|        | 0.1192  | 0.1441 | 0.2336 | 0.1388  |
|        | 0.2001  | 0.1717 | 0.1556 | 0.1784  |
| Day 3  | Control | WC     | CS-NE  | Polymer |
|        | 0.1437  | 0.1959 | 0.3858 | 0.1337  |
|        | 0.1121  | 0.3005 | 0.3293 | 0.1021  |
|        | 0.1629  | 0.3252 | 0.3015 | 0.1349  |
|        | 0.1146  | 0.1768 | 0.3601 | 0.1145  |
|        | 0.1355  | 0.3026 | 0.4368 | 0.1306  |
|        | 0.1835  | 0.3073 | 0.3265 | 0.1451  |
| Day 14 | Control | WC     | CS-NE  | Polymer |
|        | 0.1154  | 0.6252 | 0.7728 | 0.1225  |
|        | 0.1162  | 0.6971 | 0.8548 | 0.1081  |
|        | 0.1117  | 0.4872 | 0.7174 | 0.1544  |
|        | 0.1040  | 0.7030 | 0.8026 | 0.1190  |
|        | 0.0825  | 0.7734 | 0.8840 | 0.0845  |
|        | 0.1192  | 0.4940 | 0.7425 | 0.1406  |
| Day 21 | Control | WC     | CS-NE  | Polymer |
|        | 0.1929  | 0.7312 | 1.2051 | 0.1521  |
|        | 0.1549  | 1.0284 | 1.1005 | 0.1550  |
|        | 0.1237  | 0.7744 | 1.2691 | 0.1314  |
|        | 0.1861  | 0.7626 | 1.2345 | 0.1644  |
|        | 0.1395  | 1.0197 | 1.1314 | 0.1205  |
|        | 0.1059  | 0.7921 | 1.2897 | 0.1030  |

**Supplement Table S5:** Data of gene expression of 5 immune genes - IgM, IgT, IL1 $\beta$ , TNF- $\alpha$  and MHCII in the head kidney (a) and spleen (b) of vaccinated fish [CS-NE, WC, Polymer relative to unvac-cinated control fish at 1, 3, 14, 21 days post-vaccination

|             |              |        |                                     |  |      |             |        |                                     |  |      |
|-------------|--------------|--------|-------------------------------------|--|------|-------------|--------|-------------------------------------|--|------|
| Head-kidney | IgM          | Time   | Mean Fold Change in gene expression |  | SE   | IgT         | Time   | Mean Fold Change in gene expression |  | SE   |
|             |              | Day 1  | 10.70                               |  | 1.55 |             | Day 1  | 2.37                                |  | 0.57 |
|             |              | Day 3  | 4.09                                |  | 0.73 |             | Day 3  | 3.89                                |  | 1.97 |
|             |              | Day 14 | 2.04                                |  | 0.39 |             | Day 14 | 0.18                                |  | 0.14 |
|             | WC           | Day 21 | 4.33                                |  | 1.43 |             | Day 21 | 2.33                                |  | 0.27 |
|             |              | Day 1  | 12.02                               |  | 2.20 | CS-NE       | Day 1  | 5.60                                |  | 0.74 |
|             |              | Day 3  | 6.12                                |  | 2.35 |             | Day 3  | 2.96                                |  | 0.55 |
|             |              | Day 14 | 6.01                                |  | 1.43 |             | Day 14 | 1.39                                |  | 0.43 |
|             |              | Day 21 | 4.47                                |  | 0.40 |             | Day 21 | 2.73                                |  | 0.33 |
|             | Polymer      | Day 1  | 4.93                                |  | 1.62 | Polymer     | Day 1  | 2.24                                |  | 0.37 |
|             |              | Day 3  | 2.79                                |  | 0.46 |             | Day 3  | 1.55                                |  | 0.30 |
|             |              | Day 14 | 1.24                                |  | 0.33 |             | Day 14 | 0.39                                |  | 0.24 |
|             |              | Day 21 | 0.40                                |  | 0.12 |             | Day 21 | 0.19                                |  | 0.18 |
|             | TNF $\alpha$ | Time   | Mean Fold Change in gene expression |  | SE   | IL1 $\beta$ | Time   | Mean Fold Change in gene expression |  | SE   |
|             |              | Day 1  | 1.74                                |  | 0.43 |             | Day 1  | 4.69                                |  | 1.63 |
|             |              | Day 3  | 11.30                               |  | 3.57 |             | Day 3  | 2.26                                |  | 0.23 |
|             |              | Day 14 | 0.85                                |  | 0.14 |             | Day 14 | 0.97                                |  | 0.18 |
|             | WC           | Day 21 | 3.01                                |  | 1.18 |             | Day 21 | 1.88                                |  | 0.80 |
|             |              | Day 1  | 1.43                                |  | 0.12 | CS-NE       | Day 1  | 12.78                               |  | 0.93 |
|             |              | Day 3  | 12.59                               |  | 3.42 |             | Day 3  | 8.10                                |  | 2.72 |
|             |              | Day 14 | 1.10                                |  | 0.37 |             | Day 14 | 5.13                                |  | 0.63 |
|             |              | Day 21 | 1.37                                |  | 0.39 |             | Day 21 | 1.97                                |  | 0.45 |
|             | Polymer      | Day 1  | 1.78                                |  | 0.92 | Polymer     | Day 1  | 1.89                                |  | 0.66 |
|             |              | Day 3  | 1.71                                |  | 0.93 |             | Day 3  | 6.50                                |  | 2.27 |
|             |              | Day 14 | 1.04                                |  | 0.90 |             | Day 14 | 2.08                                |  | 1.67 |
|             |              | Day 21 | 0.92                                |  | 0.37 |             | Day 21 | 0.70                                |  | 0.43 |
|             | MHCII        | Time   | Mean Fold Change in gene expression |  | SE   | IgM         | Time   | Mean Fold Change in gene expression |  | SE   |
|             |              | Day 1  | 0.81                                |  | 0.29 |             | Day 1  | 13.24                               |  | 3.06 |
|             |              | Day 3  | 0.09                                |  | 0.11 |             | Day 3  | 6.67                                |  | 1.08 |
|             |              | Day 14 | 1.02                                |  | 0.79 |             | Day 14 | 7.40                                |  | 1.24 |
|             | WC           | Day 21 | 0.54                                |  | 0.53 |             | Day 21 | 5.67                                |  | 1.51 |
|             |              | Day 1  | 8.56                                |  | 0.93 | CS-NE       | Day 1  | 15.61                               |  | 5.15 |
|             |              | Day 3  | 1.30                                |  | 0.78 |             | Day 3  | 13.72                               |  | 1.68 |
|             |              | Day 14 | 1.02                                |  | 0.41 |             | Day 14 | 16.33                               |  | 2.87 |
|             |              | Day 21 | 1.09                                |  | 0.53 |             | Day 21 | 20.14                               |  | 2.65 |
|             | Polymer      | Day 1  | 0.67                                |  | 0.19 | Polymer     | Day 1  | 4.00                                |  | 0.76 |
|             |              | Day 3  | 0.39                                |  | 0.28 |             | Day 3  | 3.09                                |  | 0.47 |
|             |              | Day 14 | 0.66                                |  | 0.63 |             | Day 14 | 0.01                                |  | 0.01 |
|             |              | Day 21 | 0.35                                |  | 0.05 |             | Day 21 | 0.39                                |  | 0.12 |
| Spleen      | IgM          | Time   | Mean Fold Change in gene expression |  | SE   | IgT         | Time   | Mean Fold Change in gene expression |  | SE   |
|             |              | Day 1  | 13.24                               |  | 3.06 |             | Day 1  | 5.50                                |  | 1.40 |
|             |              | Day 3  | 6.67                                |  | 1.08 |             | Day 3  | 2.47                                |  | 0.33 |
|             |              | Day 14 | 7.40                                |  | 1.24 | WC          | Day 14 | 2.35                                |  | 0.91 |
|             | WC           | Day 21 | 5.67                                |  | 1.51 |             | Day 21 | 1.03                                |  | 0.75 |
|             |              | Day 1  | 15.61                               |  | 5.15 | CS-NE       | Day 1  | 14.17                               |  | 3.49 |
|             |              | Day 3  | 13.72                               |  | 1.68 |             | Day 3  | 1.99                                |  | 0.43 |
|             |              | Day 14 | 16.33                               |  | 2.87 |             | Day 14 | 4.67                                |  | 1.39 |
|             |              | Day 21 | 20.14                               |  | 2.65 |             | Day 21 | 2.45                                |  | 0.57 |
|             | Polymer      | Day 1  | 4.00                                |  | 0.76 | Polymer     | Day 1  | 2.55                                |  | 0.44 |
|             |              | Day 3  | 3.09                                |  | 0.47 |             | Day 3  | 2.88                                |  | 0.76 |
|             |              | Day 14 | 0.01                                |  | 0.01 |             | Day 14 | 0.02                                |  | 0.01 |
|             |              | Day 21 | 0.39                                |  | 0.12 |             | Day 21 | 0.71                                |  | 0.17 |
|             | TNF $\alpha$ | Time   | Mean Fold Change in gene expression |  | SE   | IL1 $\beta$ | Time   | Mean Fold Change in gene expression |  | SE   |
|             |              | Day 1  | 4.31                                |  | 2.18 |             | Day 1  | 5.50                                |  | 1.40 |
|             |              | Day 3  | 2.59                                |  | 0.34 |             | Day 3  | 2.47                                |  | 0.33 |
|             |              | Day 14 | 2.45                                |  | 0.20 | WC          | Day 14 | 1.93                                |  | 0.66 |
|             | WC           | Day 21 | 1.13                                |  | 0.71 |             | Day 21 | 1.03                                |  | 0.75 |
|             |              | Day 1  | 21.91                               |  | 1.58 | CS-NE       | Day 1  | 14.80                               |  | 2.55 |
|             |              | Day 3  | 6.16                                |  | 1.28 |             | Day 3  | 5.88                                |  | 0.39 |
|             |              | Day 14 | 6.78                                |  | 0.80 |             | Day 14 | 5.38                                |  | 1.60 |
|             |              | Day 21 | 4.29                                |  | 0.81 |             | Day 21 | 5.10                                |  | 0.96 |
|             | Polymer      | Day 1  | 10.73                               |  | 2.39 | Polymer     | Day 1  | 10.48                               |  | 2.77 |
|             |              | Day 3  | 3.63                                |  | 2.35 |             | Day 3  | 3.99                                |  | 1.10 |
|             |              | Day 14 | 1.68                                |  | 0.36 |             | Day 14 | 0.01                                |  | 0.00 |
|             |              | Day 21 | 0.19                                |  | 0.04 |             | Day 21 | 1.28                                |  | 0.50 |
|             | MHCII        | Time   | Mean Fold Change in gene expression |  | SE   | IgM         | Time   | Mean Fold Change in gene expression |  | SE   |
|             |              | Day 1  | 0.69                                |  | 0.10 |             | Day 1  | 13.24                               |  | 3.06 |
|             |              | Day 3  | 0.78                                |  | 0.19 |             | Day 3  | 6.67                                |  | 1.08 |
|             |              | Day 14 | 2.61                                |  | 0.82 |             | Day 14 | 7.40                                |  | 1.24 |
|             | WC           | Day 21 | 0.72                                |  | 0.74 |             | Day 21 | 5.67                                |  | 1.51 |
|             |              | Day 1  | 1.68                                |  | 0.53 | CS-NE       | Day 1  | 15.61                               |  | 5.15 |
|             |              | Day 3  | 4.74                                |  | 2.82 |             | Day 3  | 13.72                               |  | 1.68 |
|             |              | Day 14 | 4.78                                |  | 1.50 |             | Day 14 | 16.33                               |  | 2.87 |
|             |              | Day 21 | 3.85                                |  | 1.45 |             | Day 21 | 20.14                               |  | 2.65 |
|             | Polymer      | Day 1  | 1.29                                |  | 0.15 | Polymer     | Day 1  | 4.00                                |  | 0.76 |
|             |              | Day 3  | 1.38                                |  | 0.36 |             | Day 3  | 3.09                                |  | 0.47 |
|             |              | Day 14 | 1.00                                |  | 0.77 |             | Day 14 | 0.01                                |  | 0.01 |
|             |              | Day 21 | 1.91                                |  | 1.25 |             | Day 21 | 0.39                                |  | 0.12 |
